# Supplementary material for: Sequencing and analysis of a South Asian-Indian personal genome
Source: PubMed Central journal article supplement (PMC3534380; doi:10.1186/1471-2164-13-440), 2012-08-31

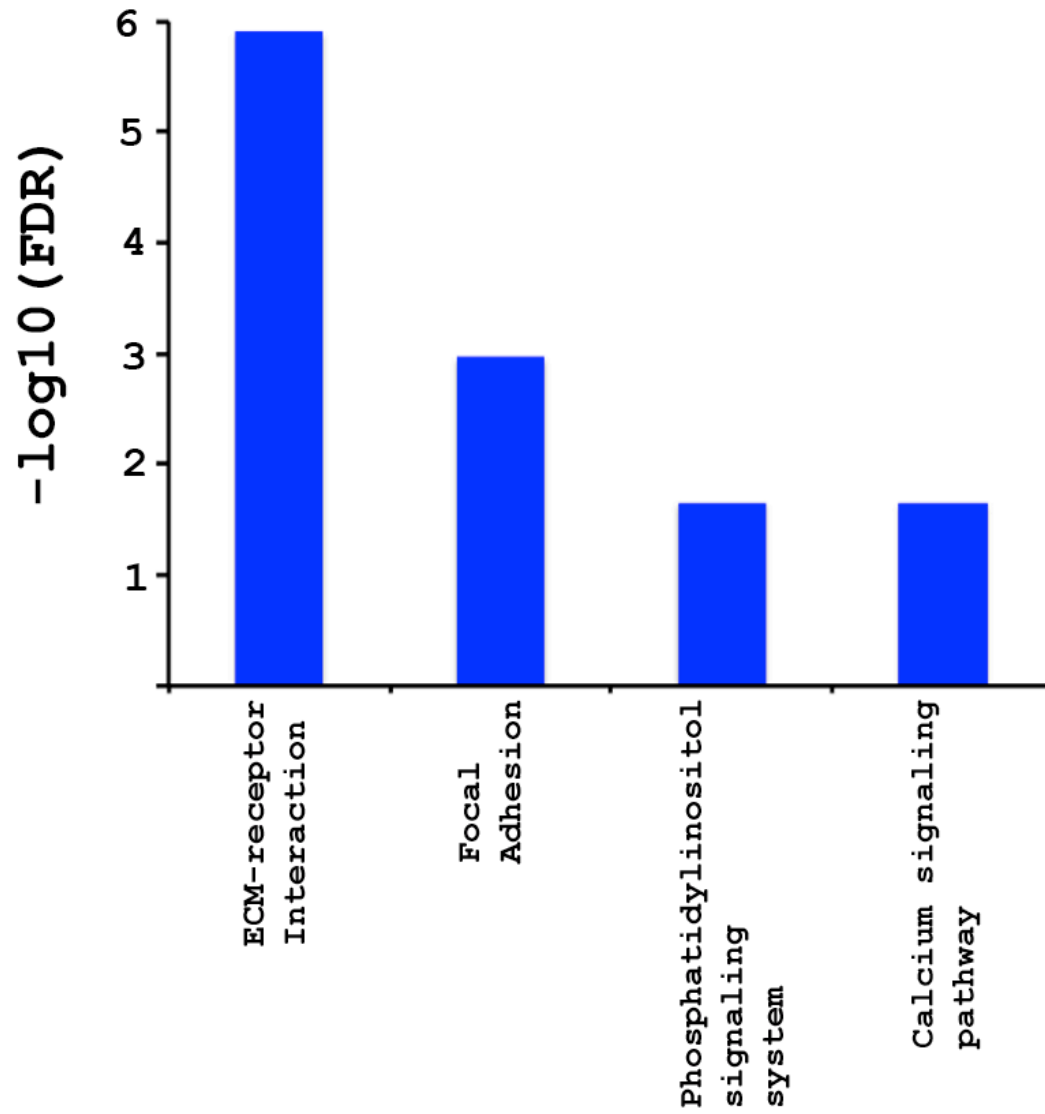

Supplementary Fig. 1

# MMP28 protein

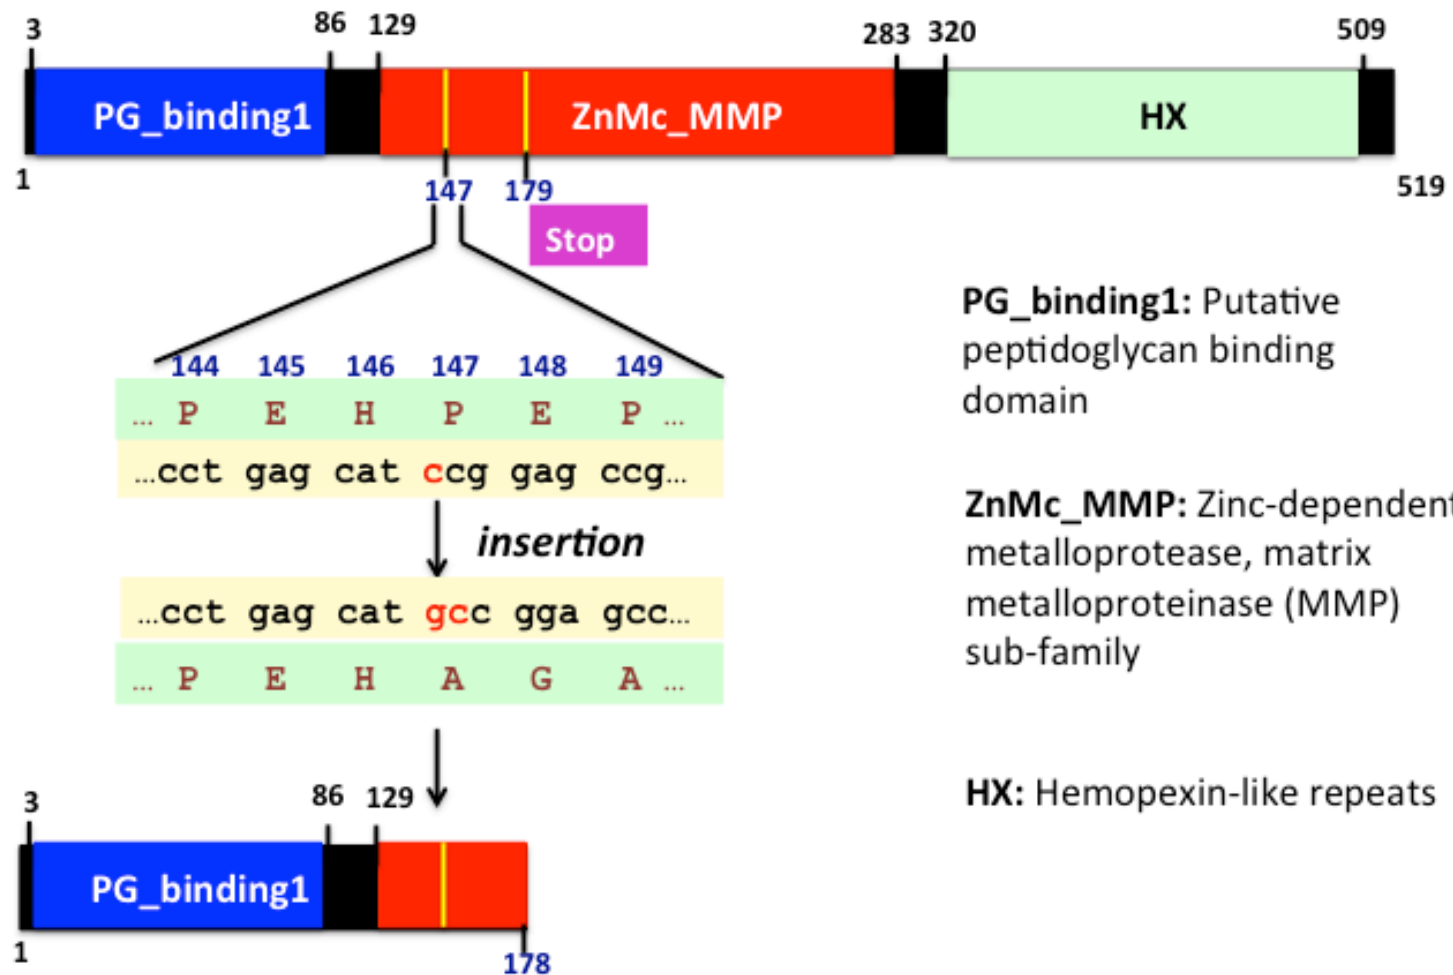

**PG\_binding1:** Putative peptidoglycan binding domain

**ZnMc\_MMP:** Zinc-dependent metalloprotease, matrix metalloproteinase (MMP) sub-family

**HX:** Hemopexin-like repeats

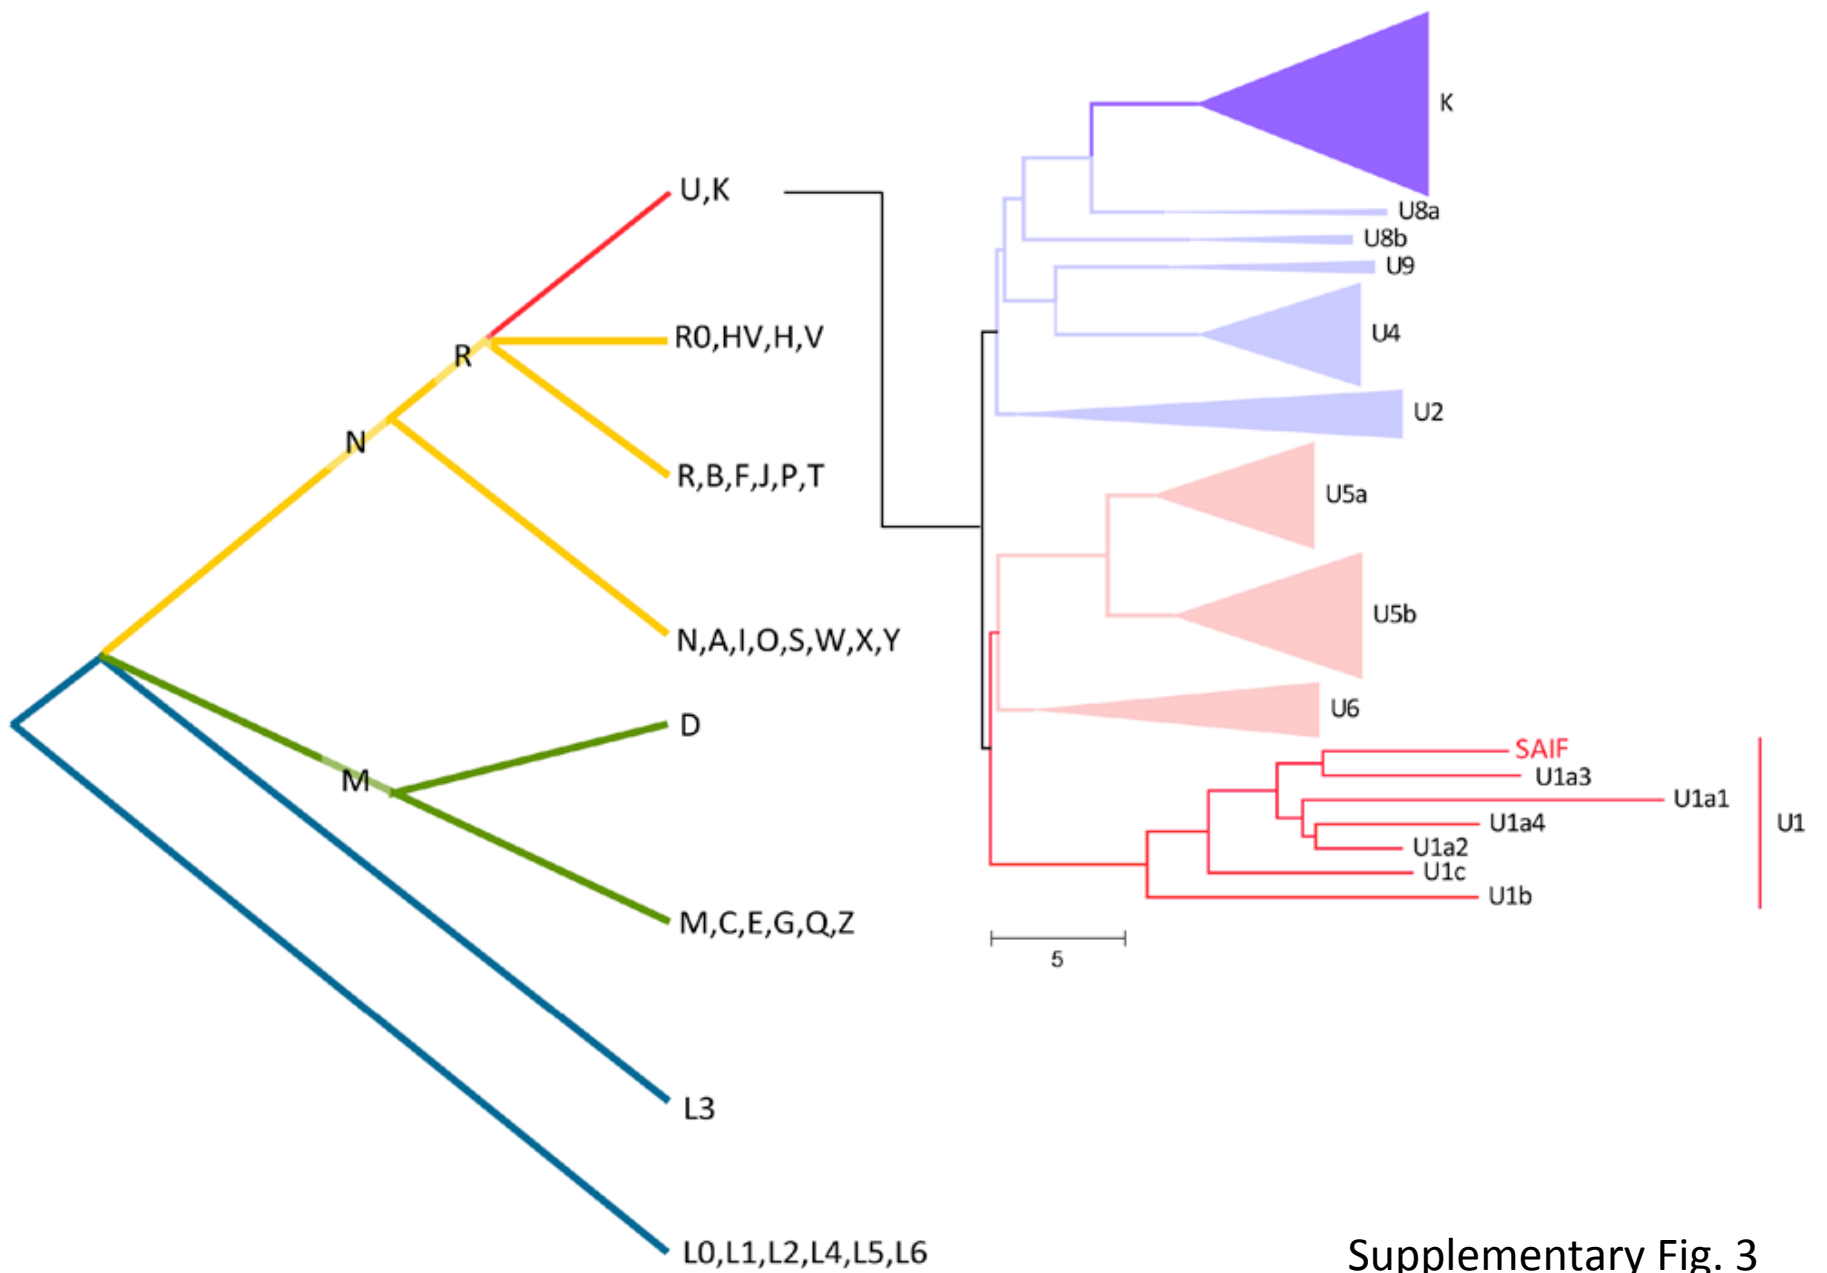

Supplementary Fig. 3

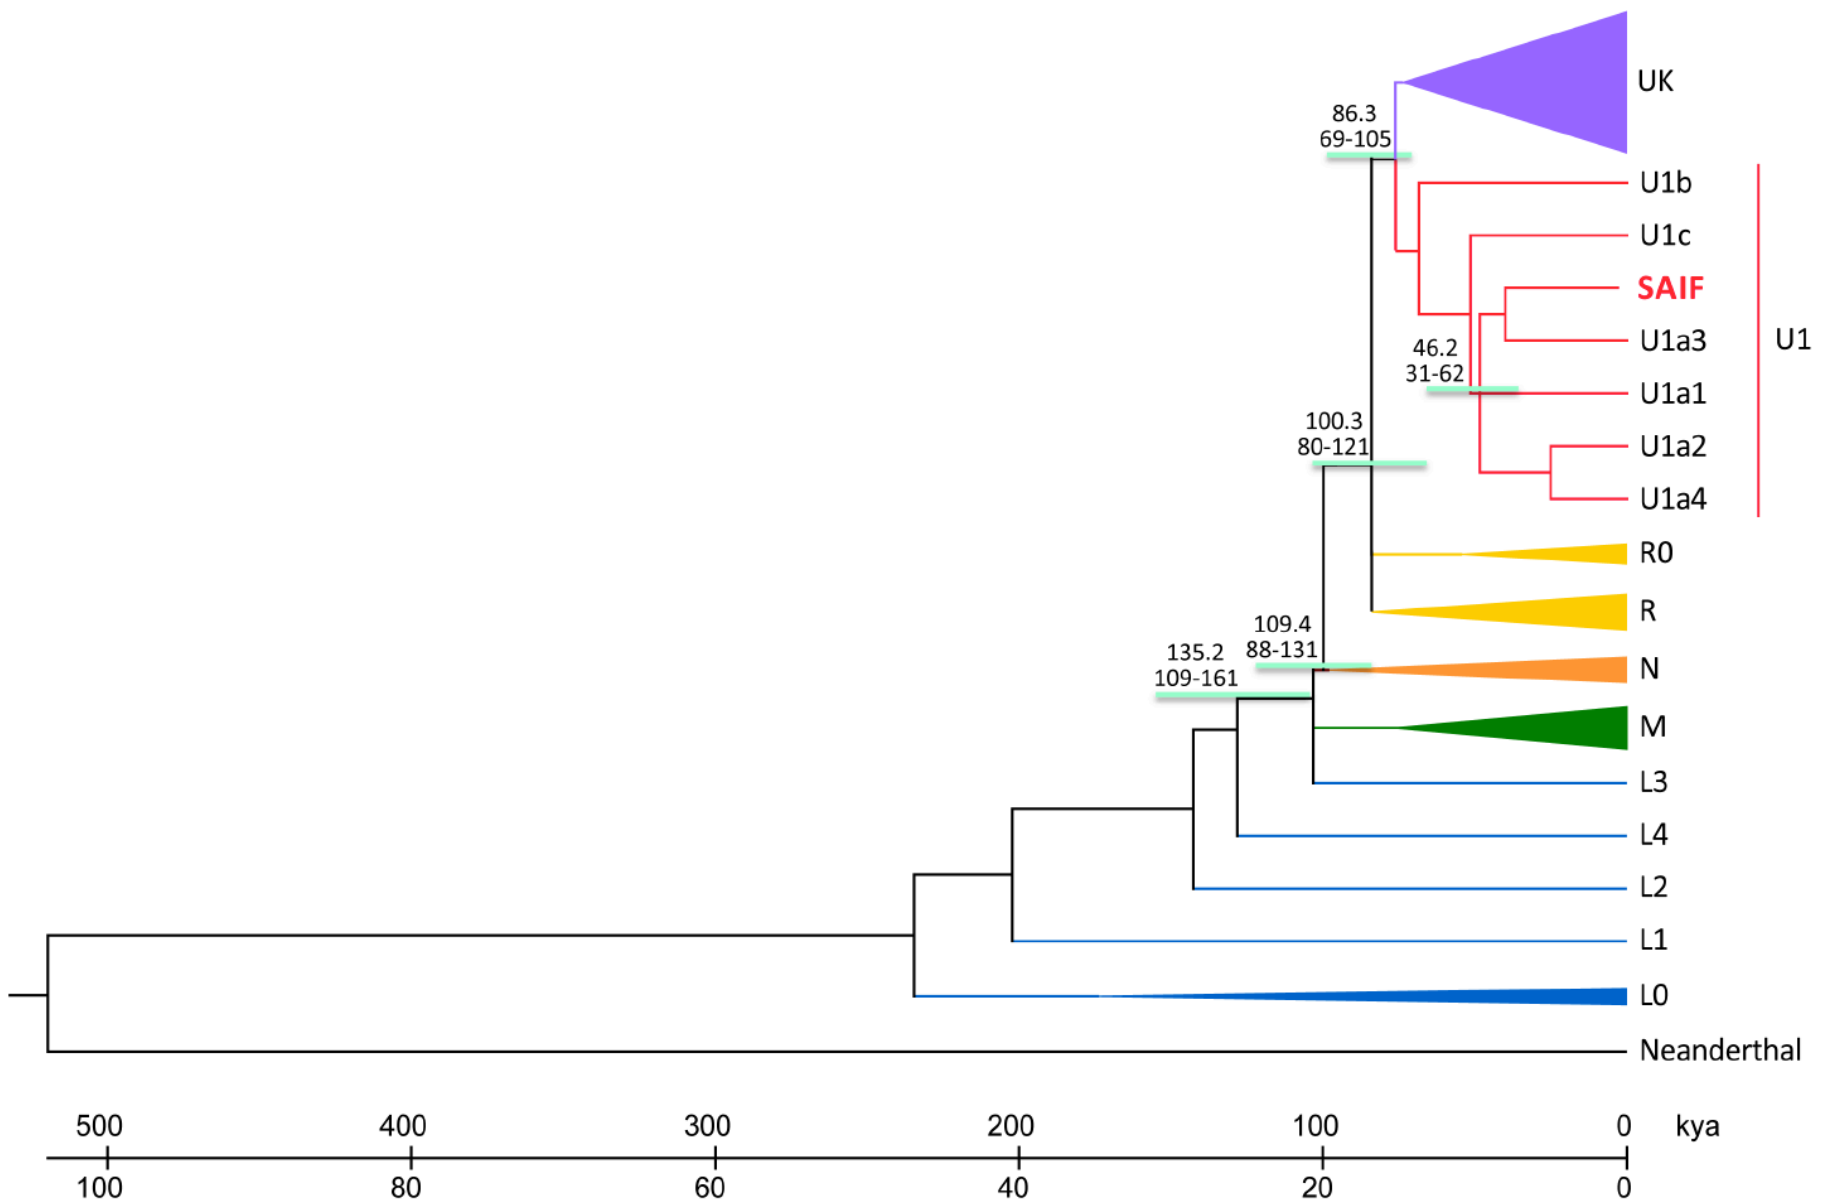

Supplementary Fig. 4

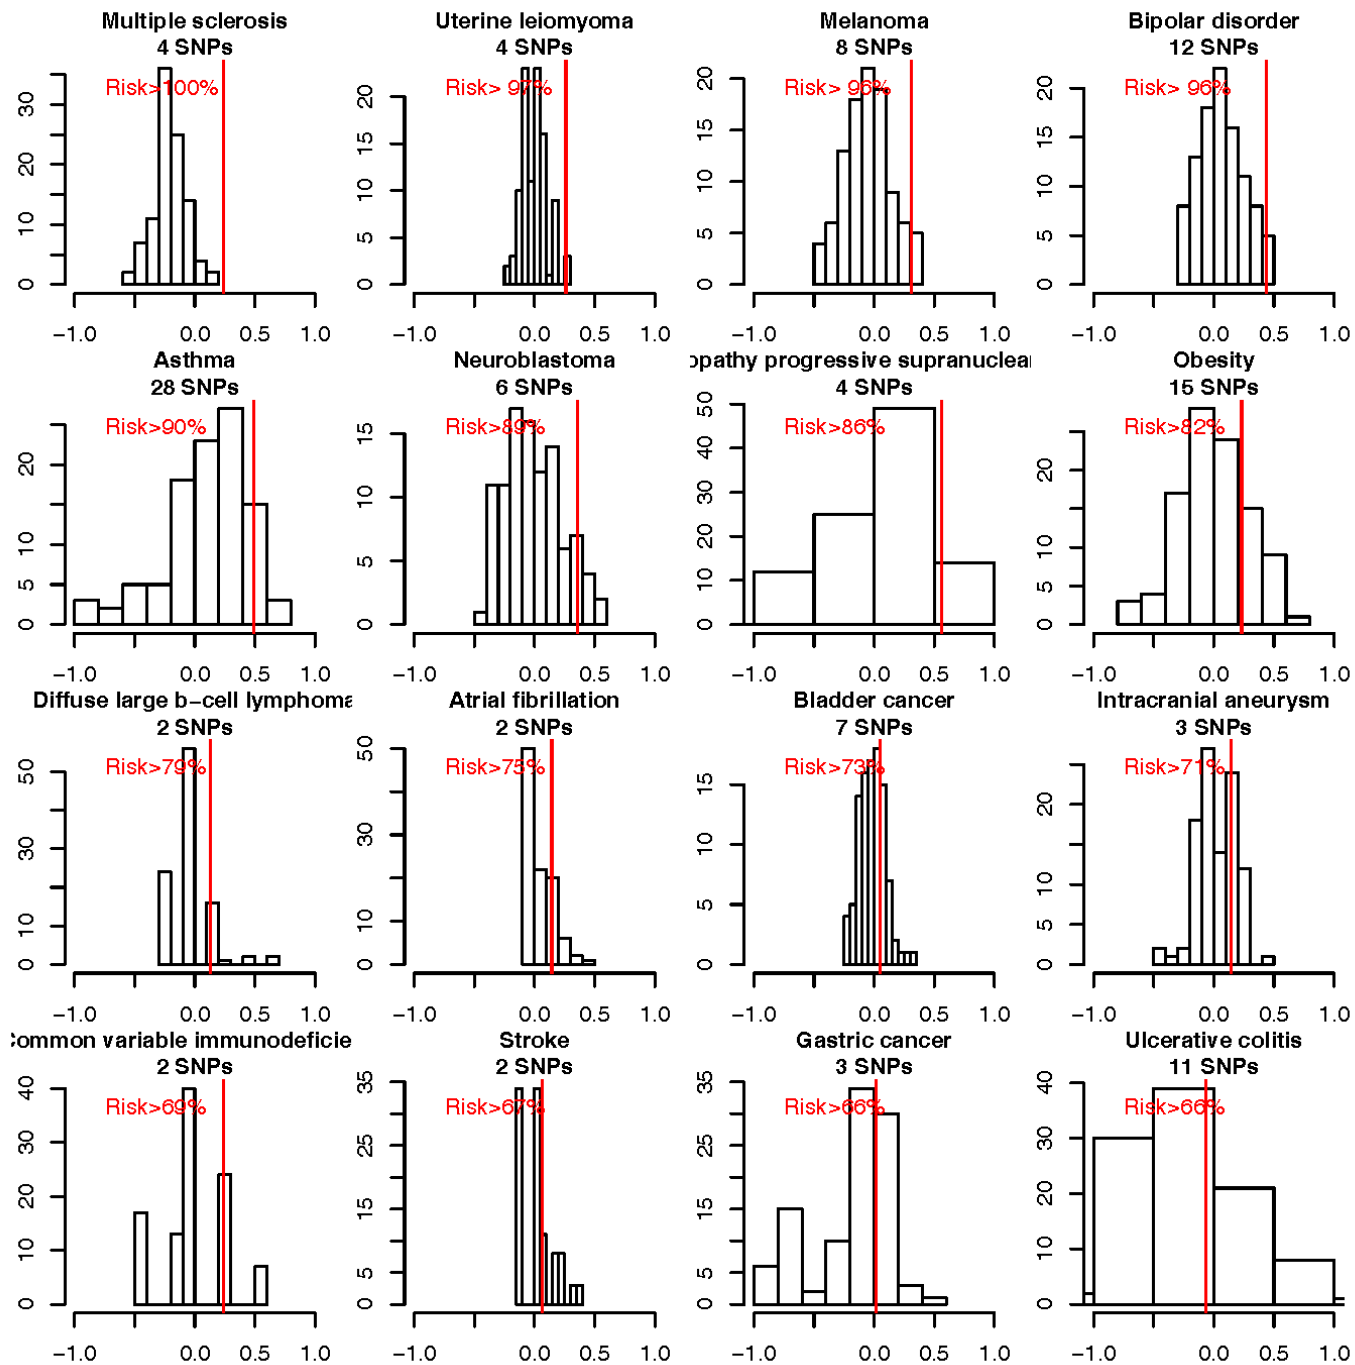

Supplementary Fig. 5

## Uterine leiomyoma

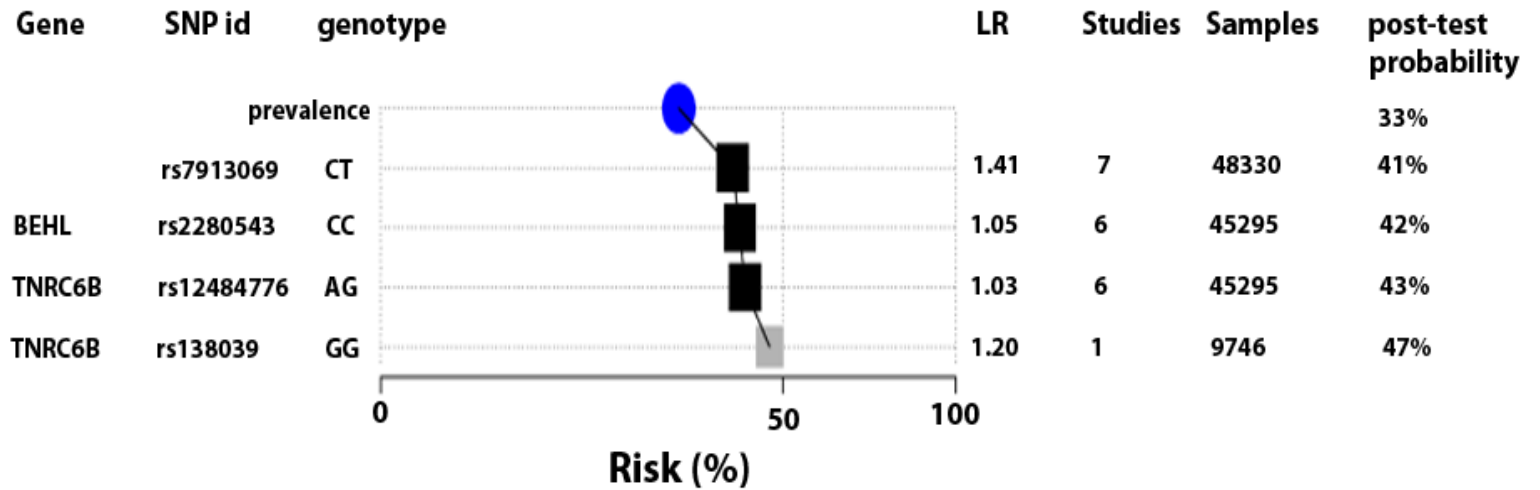

# Asthma

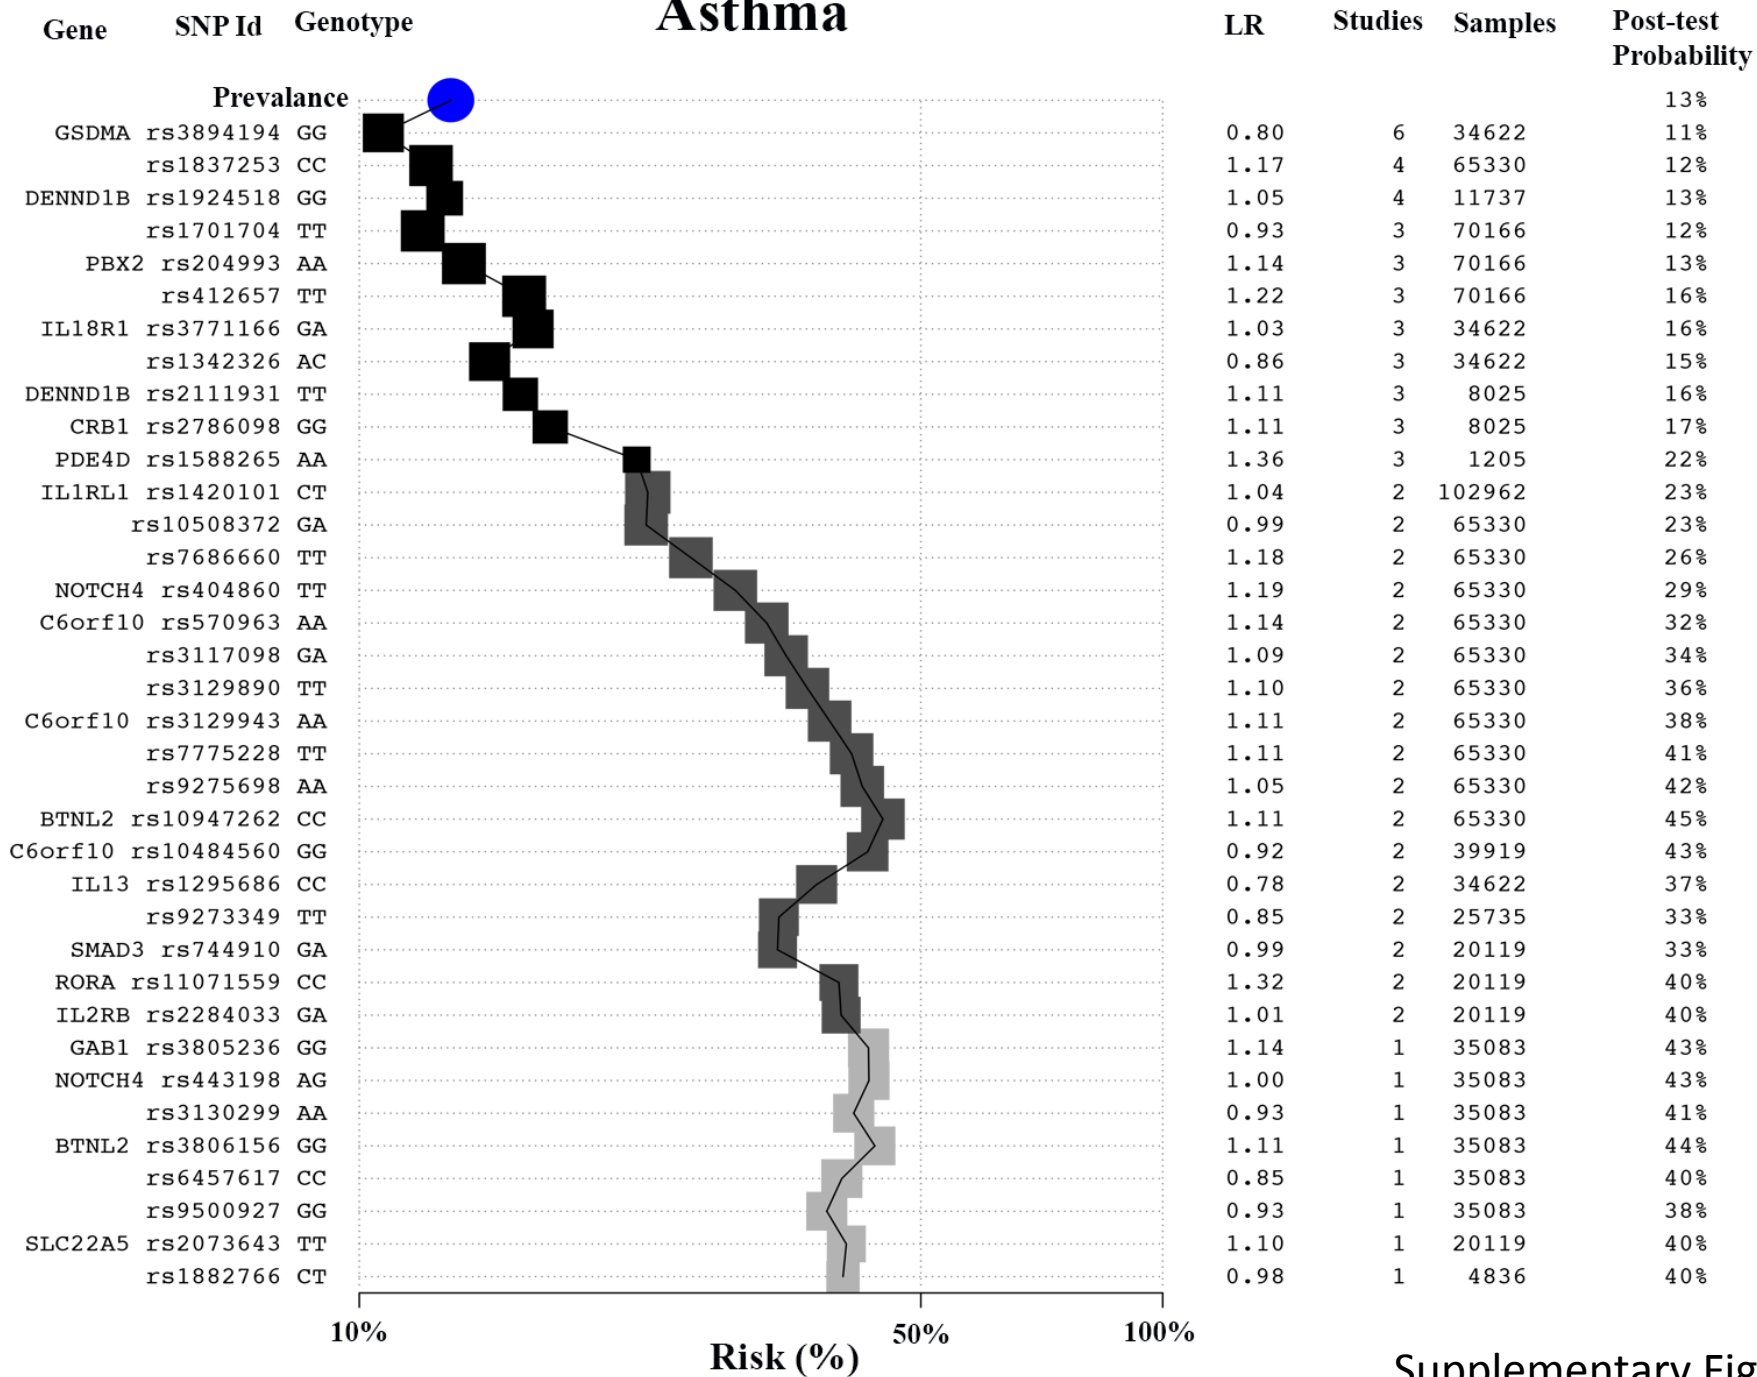

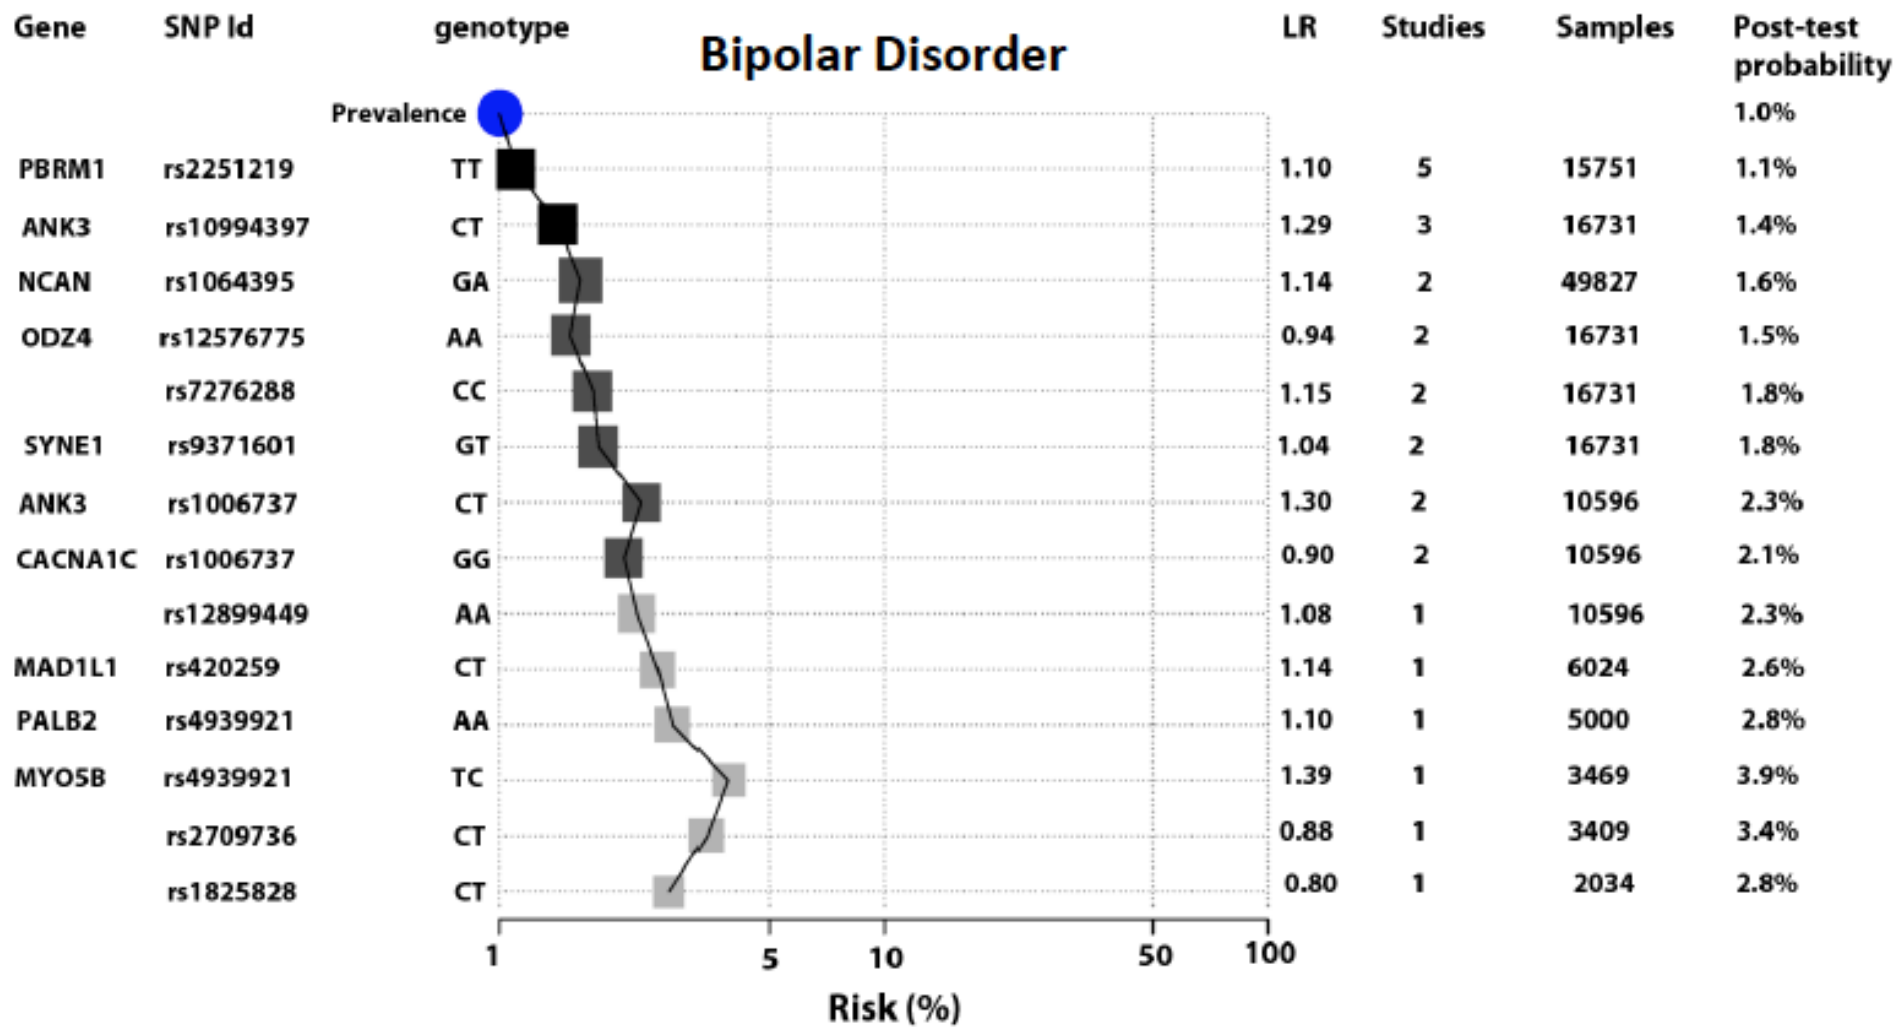

Supplement: 1471-2164-13-440-S1.pdf [file 1471-2164-13-440-S1.pdf]
